# Supplementary material for: Titin-truncating variants affect heart function in disease cohorts and the general population
Source: Springer Nature journal article supplement (doi:10.1038/ng.3719), 2016-11-21
Supplement: 41588_2017_BFng3719_MOESM32_ESM.pdf [file 41588_2017_BFng3719_MOESM32_ESM.pdf]

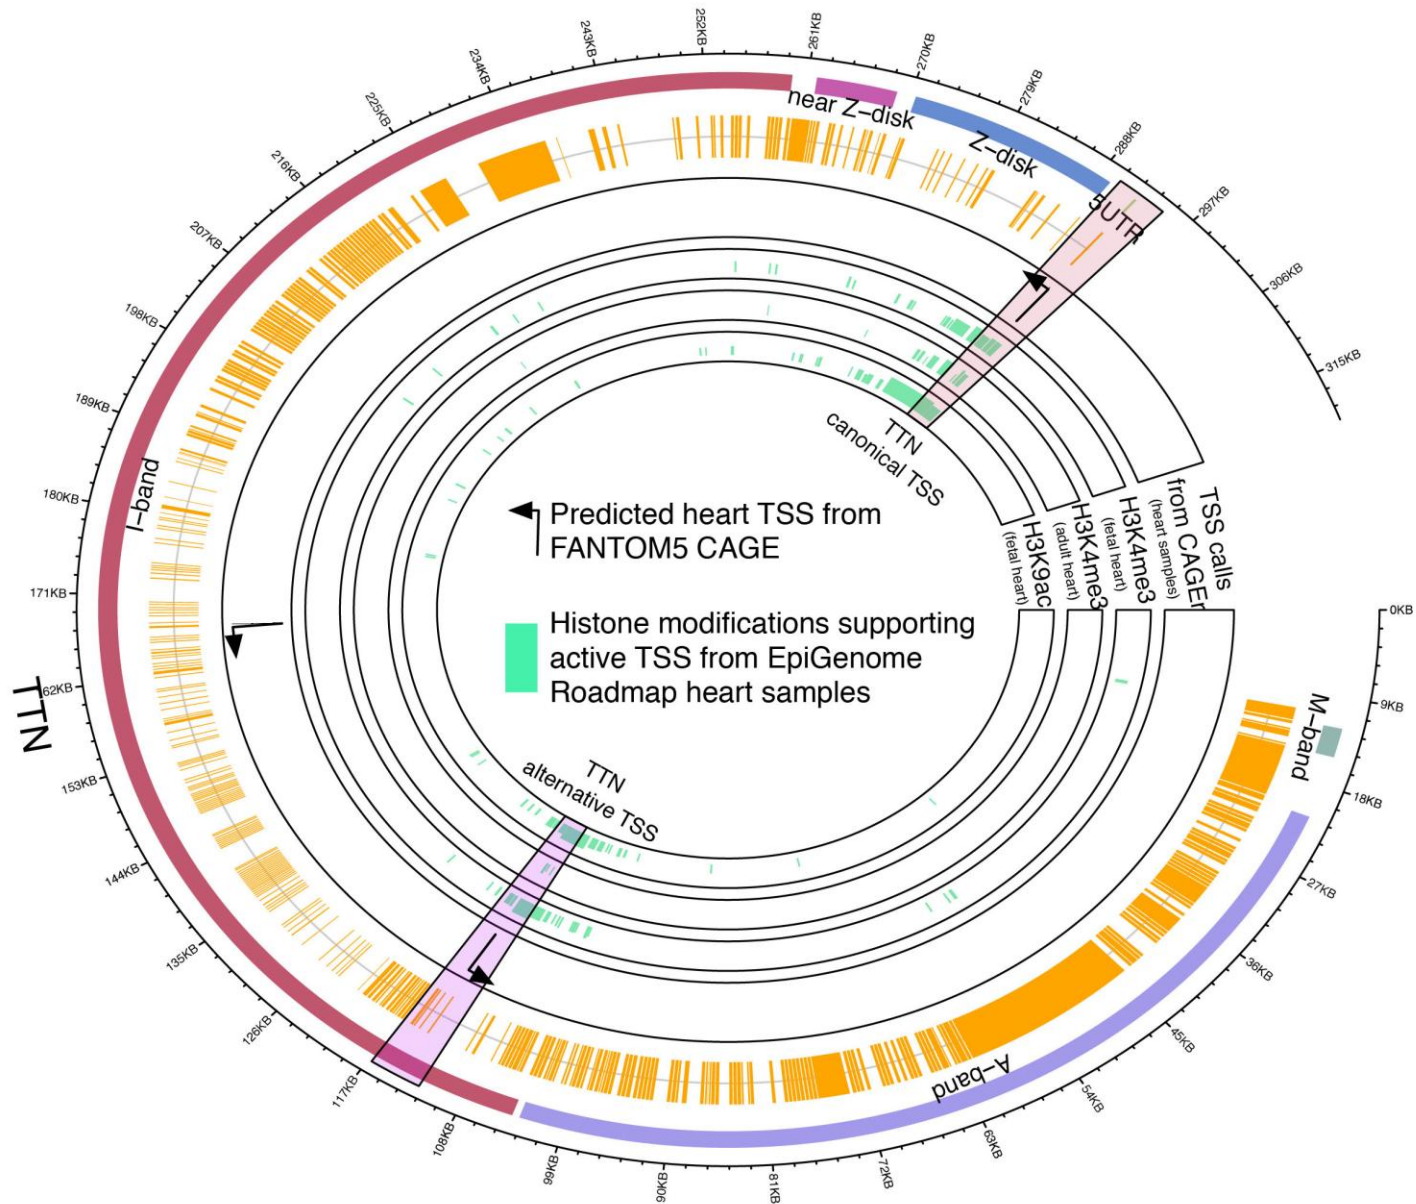

**Supplementary Figure 1**

**Identification of an alternative, distal transcription start site in Titin.**

From outside to inside, track 1 shows the location of the subunits of titin; the gene is on the antisense strand and so is transcribed counterclockwise in this view. Track 2 shows the gene structure of titin with the exons shown as orange rectangles and the introns shown as black lines. Track 3 shows the location of transcription start sites identified by the analysis of CAGE data taken from human heart samples in the FANTOM5 consortium as identified using CAGEr. Track 4 shows the location of H3K4me3 ChIP-seq narrow peaks (a mark of active promoters) from fetal heart samples in the Epigenomics Roadmap data set. Track 5 shows H3K4me3 ChIP-seq peaks from adult heart (left ventricle) taken from the Epigenomics Roadmap data set. Track 6 shows H3K9ac (also a mark of active promoters) taken from the fetal heart samples in the Epigenomics Roadmap data set. Together these data show that in the heart there are likely two transcription start sites, the canonical transcription start site at the beginning of the gene and another transcription start site found close to the start A-band, which appears to be most strongly used in fetal heart but is still present in adult human heart.

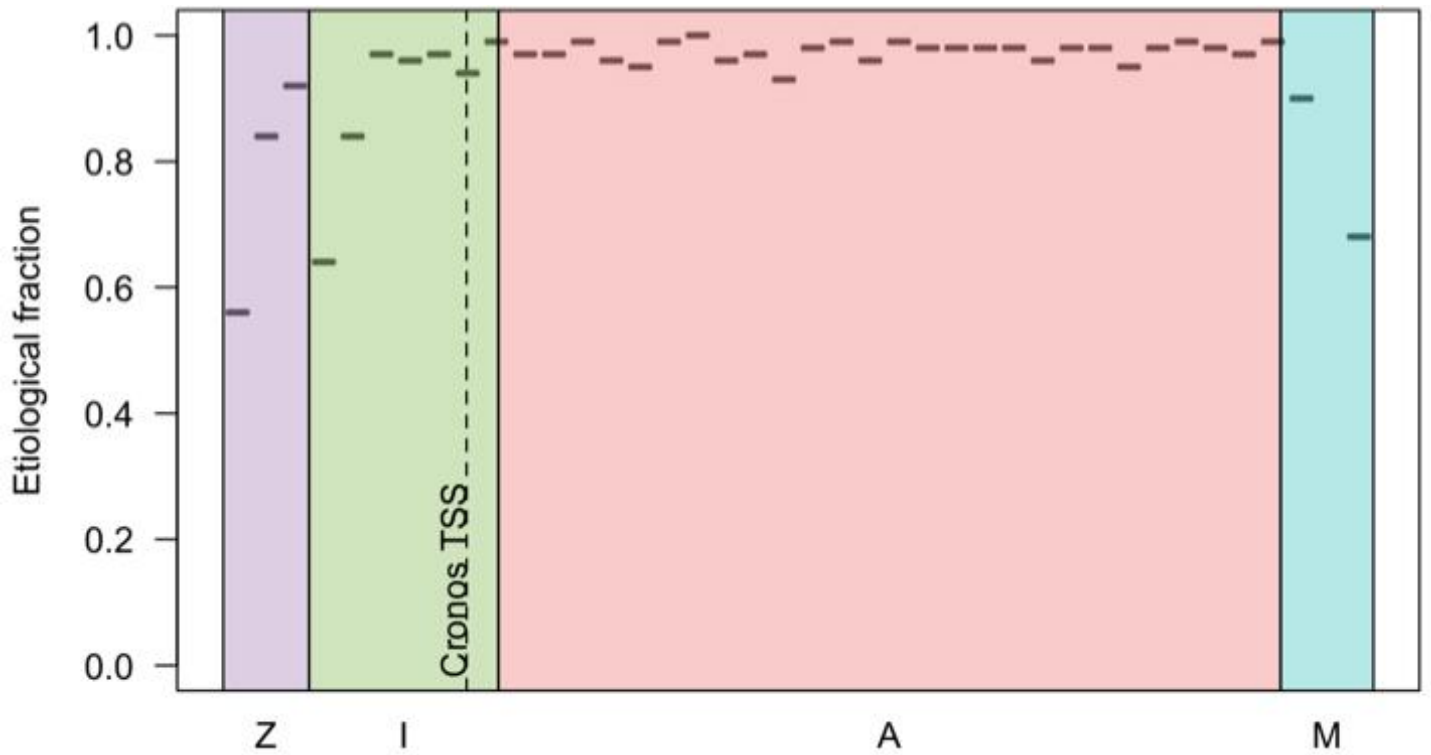

**Supplementary Figure 2**

**Etiological fraction of TTNtv in 40 bins across the titin locus.**

The constitutive (PSI > 90%) regions of titin are split into 40 bins ranging from the N terminus to the C terminus, and the etiological fraction of TTNtv for each individual region is plotted. The dashed line marks the position of the internal *Cronos* promoter. Purple, Z-disc; green, I-band; pink, A-band; blue, M-line.

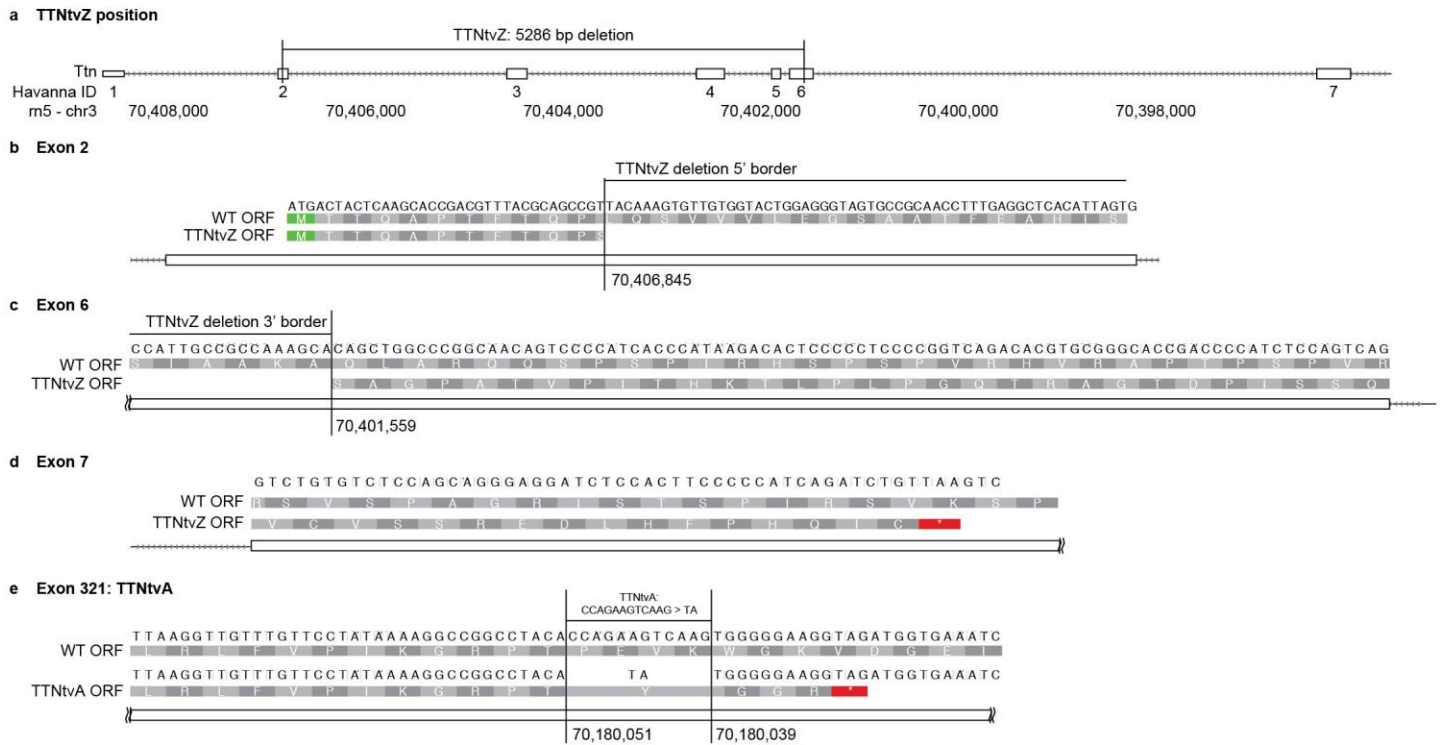

### Supplementary Figure 3

#### Truncating mutations introduced to F344 rats.

(a) The proximal truncating variant in titin is a large deletion located near the Z-disc at the N terminus of the meta transcript (TTNvZ). It spans from exon 2 (b) to exon 6 (c). Exons 3–5 are not present in TTNvZ rats and can thus be used to assess transcription and translation from the wild-type allele in heterozygous animals. (d) The deletion causes a frameshift that results in a premature stop codon located in exon 7. (e) The truncating variant in the A-band is located in the large exon 312 and an indel that also causes a frameshift and introduces a stop codon shortly after.

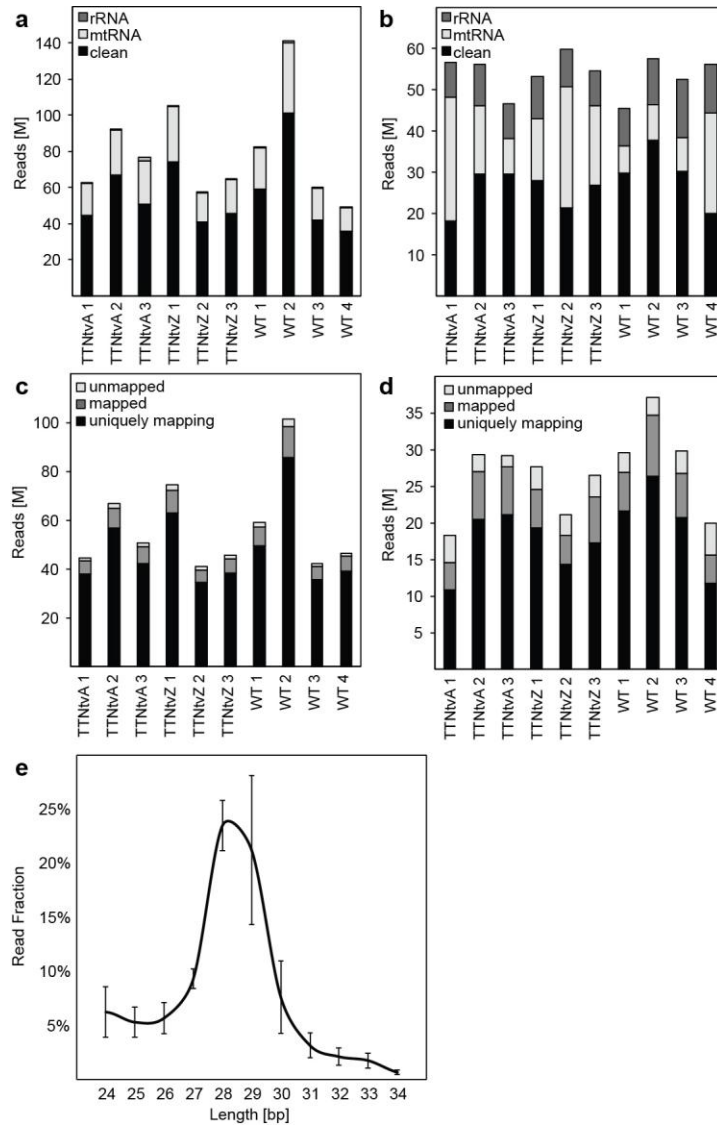

**Supplementary Figure 4**

**RNA sequencing and ribosome profiling data for TTNvA, TTNvZ and wild-type rats.**

(a,b) RNA-seq reads (a) and Ribo-seq reads (b) mapping to mitochondrial and ribosomal sequences were filtered out, and the remaining sequences were mapped to the genome. (c,d) Uniquely mapping RNA-seq (c) and Ribo-seq (d) reads were counted and used in later analyses to assess gene expression on the transcriptional and translational levels. (e) After adaptor trimming, Ribo-seq libraries displayed a size distribution typical for ribosome profiling experiments: ribosomes mostly protected RNA fragments of 28 and 29 bp in size.

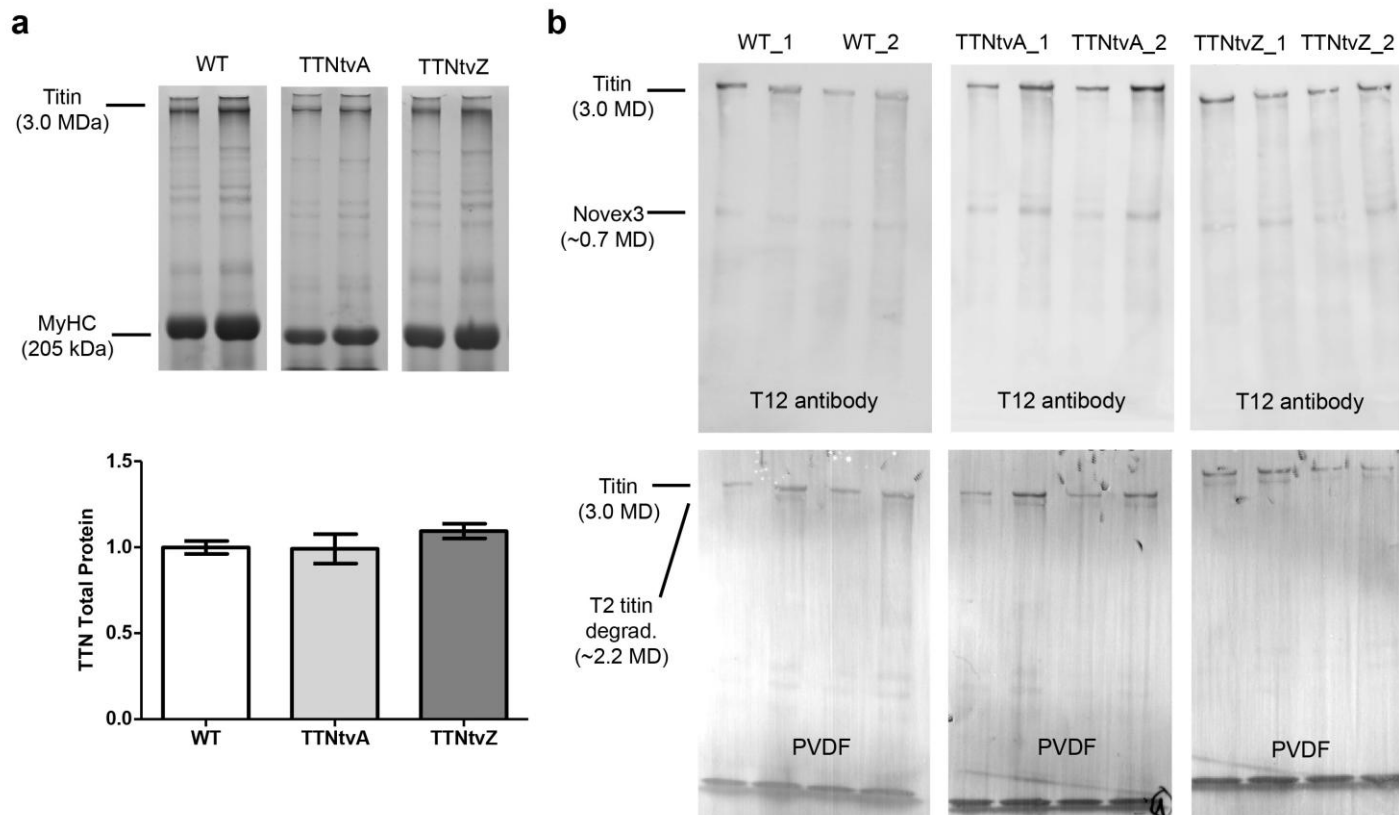

### Supplementary Figure 5

#### Absence of truncated Ttn protein in TTNtvA and TTNtvZ rat hearts.

Representative titin gels and immunoblots from 3-month-old wild-type, TTNtvA and TTNtvZ rat hearts. **(a)** SDS-PAGE was performed on 2.5% polyacrylamide/1% agarose gels, and total protein was visualized by Coomassie blue staining. Each sample was analyzed in duplicate at lower (left) and higher (right) protein concentration. Mhc was used as a loading control. The relative Ttn/Mhc ratio was determined (below). Data are shown as means  $\pm$  s.e.m. ( $n = 4$ /group). **(b)** Immunoblotting analysis on 1.8% polyacrylamide/1% agarose gel transferred to PVDF and blotted with T12 antibody against titin and Novex3 (top). The corresponding PVDF blot was used as loading control (bottom).

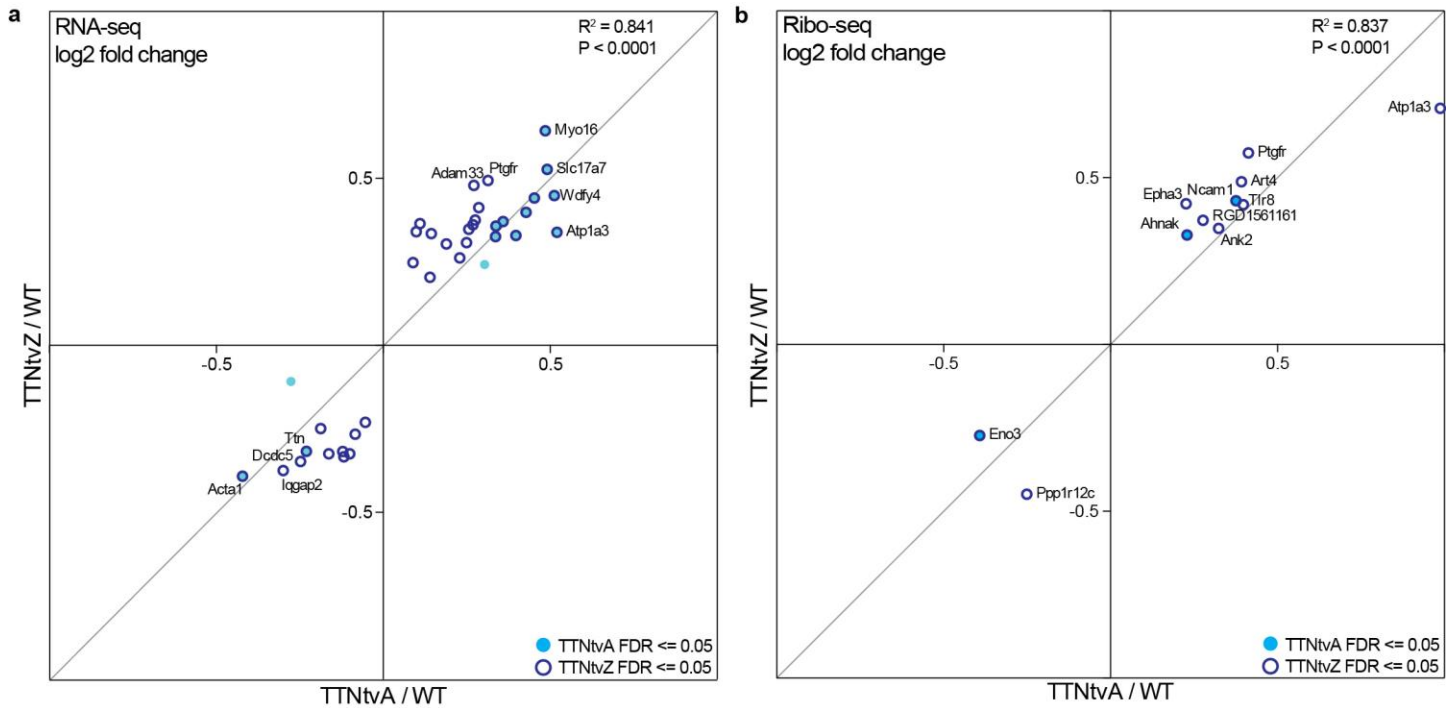

**Supplementary Figure 6**

**Transcriptional and translational gene expression differences between wild-type and TTNtv rats.**

(a,b) Differential gene transcription (a) and translation (b) is compared between TTNtv and wild-type rats. Both TTNtvA and TTNtvZ show highly correlated fold changes in differentially expressed genes (DEseq2 FDR ≤ 0.05) when compared to control rats (Pearson correlation). Genes that were not differentially expressed in any comparison were not considered.

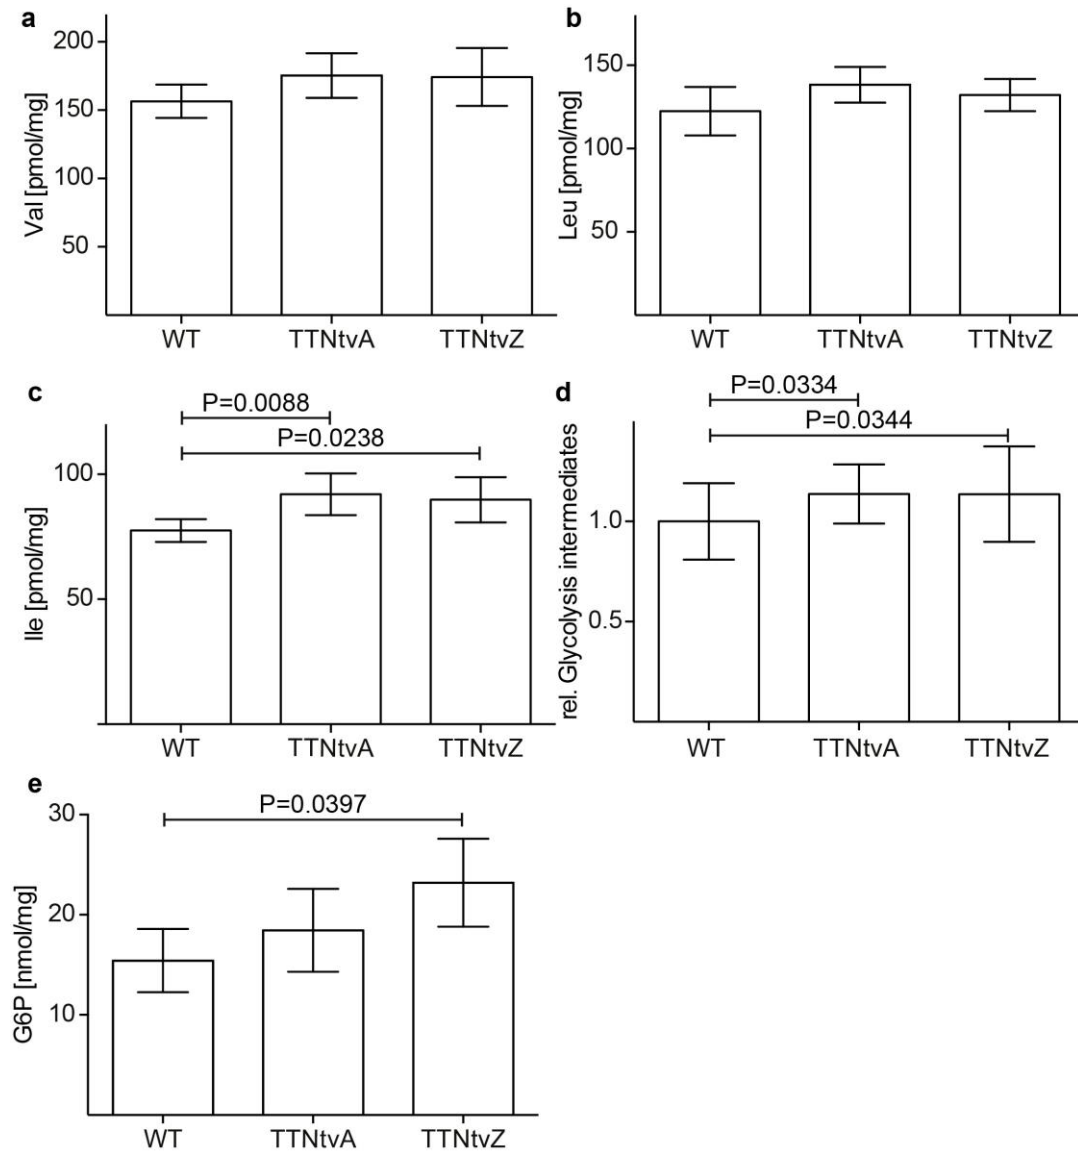

**Supplementary Figure 7**

**Differences in cardiac metabolism between wild-type, TTNtvA and TTNtvZ rats.**

(a–c) Metabolite profiles showing branched-chain amino acids, including valine (a), leucine (b) and isoleucine (c). (d) Sum of measured glycolytic intermediates (metabolites are detailed in **Supplementary Table 3**). (e) Glucose-6-phosphate (G6P) levels in cardiac tissue from wild-type ( $n = 6$ ) and TTNtv (TTNtvA,  $n = 6$ ; TTNtvZ,  $n = 6$ ) rats. Data are shown as mean  $\pm$  s.d. (Dunnett).

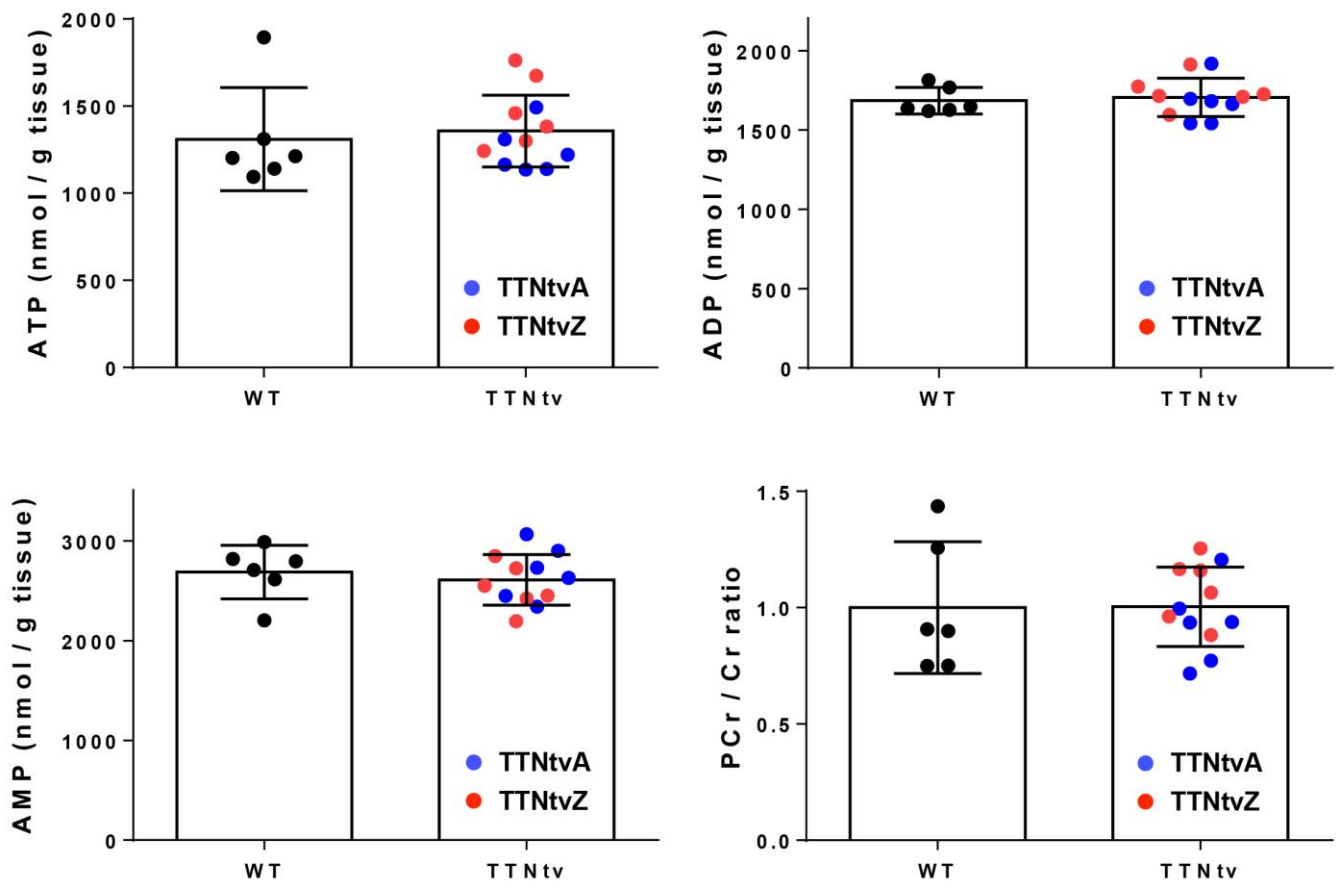

**Supplementary Figure 8**

**TTNtv rat hearts have normal energy substrate abundance.**

Metabolite levels of ATP, ADP, AMP and ratio of phosphocreatine (PCr) to creatine (Cr) in 4-month-old wild-type ( $n = 6$ ) and TTNtv (TTNtvA,  $n = 6$ ; TTNtvZ,  $n = 6$ ) rat hearts.



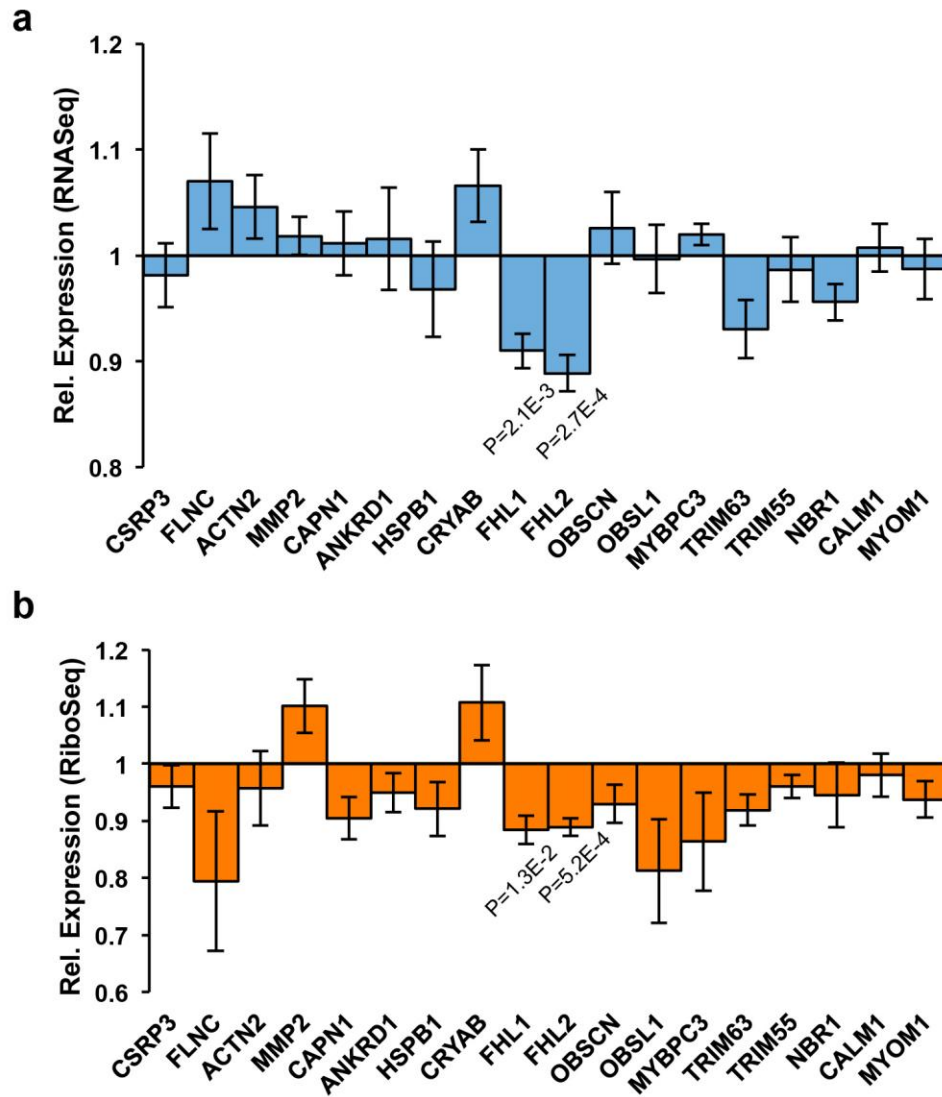

Supplementary Figure 9

Relative expression of titin-associated proteins in wild-type and TTNtv rats.

(a,b) Relative difference (TTNtv/WT) in transcription (a) and translation (b) of titin-associated proteins showing a significant decrease in FHL1 and FHL2 expression in 8-week-old TTNtv (TTNtvA,  $n = 3$ ; TTNtvZ,  $n = 3$ ) as compared to wild-type ( $n = 4$ ) rats. Data are shown as mean fold change  $\pm$  s.e.m. \* $P < 0.05$  (DEseq2  $P$  value, not corrected for genome-wide testing).

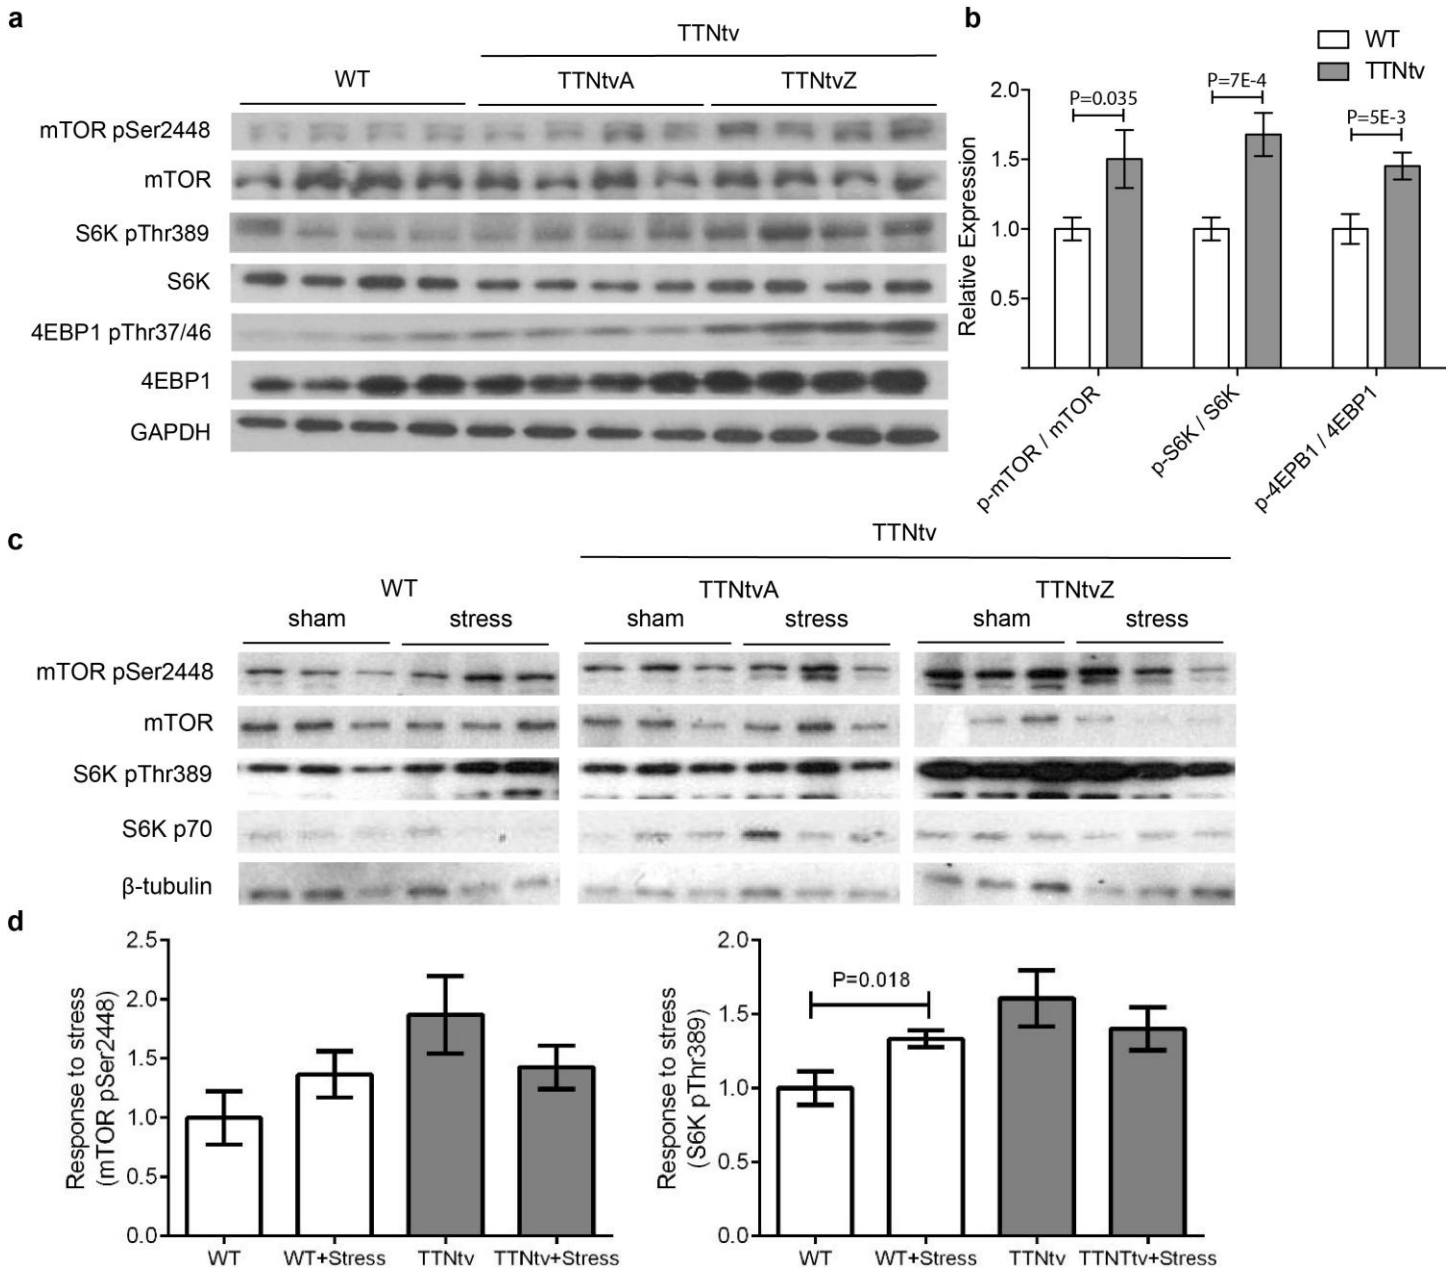

**Supplementary Figure 10**

**mTORC1 signaling is altered in TTNtv rat hearts.**

(a) Immunoblot analysis showing increased phosphorylation of mTOR (Ser2448), S6 kinase (Thr389) and 4EBP1 (Thr37/46) in TTNtv as compared to wild-type hearts in extracts from rats immediately after sacrifice. (b) Semiquantitative densitometry of band intensities from several immunoblots across separate experiments and shown as means  $\pm$  s.e.m. (Student's *t* test, Welsh correction). (c) Immunoblot analysis of phosphorylated mTOR (Ser2448) and S6 kinase (Thr389) in myocardial tissue following sham treatment or volume overload in wild-type and TTNtv rat hearts on the Langendorff apparatus perfused for the same duration. (d) Semiquantitative densitometry representation of band intensities from the blot in c and other experiments showing mTOR and S6K response to acute stress relative to wild-type unstressed hearts of the respective genotypes. Data are shown as means  $\pm$  s.d. (versus unstressed wild-type hearts, Student's *t* test, Welsh correction).

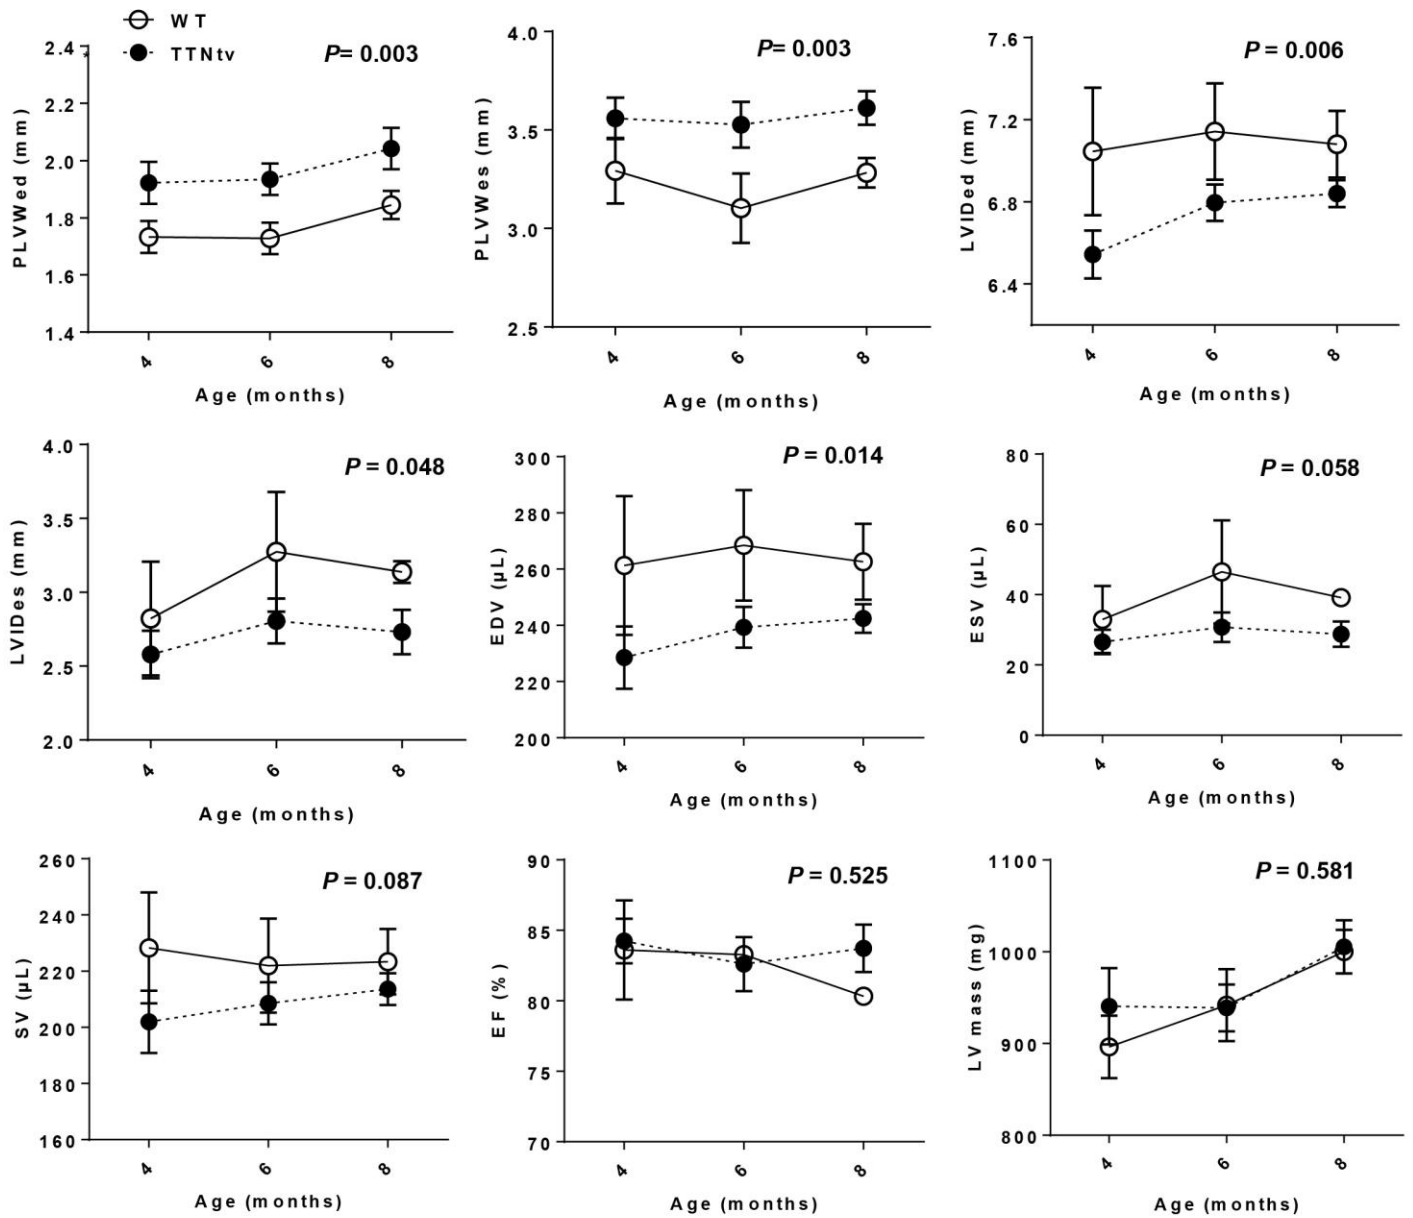

Supplementary Figure 11

**Young TTNtv rats display concentric remodeling.**

Echocardiographic measurements of 4- to 8-month-old male wild-type ( $n = 4$ ) and TTNtv (TTNtvA,  $n = 4$ ; TTNtvZ,  $n = 4$ ) rats. PLVWed (mm), posterior left ventricular wall thickness end diastole; PLVWes (mm), posterior left ventricular wall thickness end diastole; LVIDed (mm), left ventricular internal diameter end diastole; LVIDes (mm), left ventricular internal diameter end systole; EDV ( $\mu$ L), end-diastolic volume; ESV ( $\mu$ L), end-systolic volume; SV ( $\mu$ L), stroke volume. EF (%), ejection fraction.  $P$  values indicate statistical analysis by two-way analysis of variance (ANOVA).

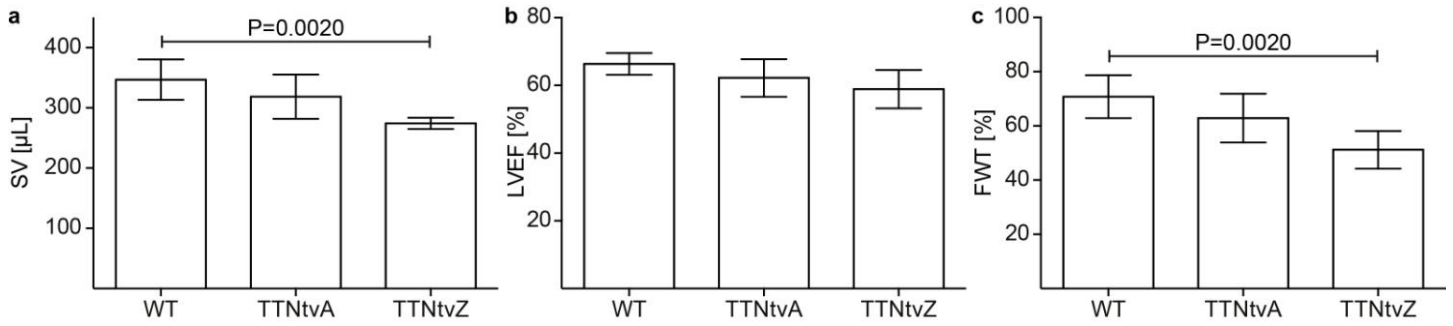

## Supplementary Figure 12

### CMR in TTNtvA and TTNtvZ rats.

(a–c) SV (stroke volume) (a), LVEF (left ventricular ejection fraction) (b) and FWT (fractional wall thickening) (c) measured with CMR in 13- to 16-month-old male wild-type ( $n = 5$ ) and TTNtv (TTNtvA,  $n = 8$ ; TTNtvZ,  $n = 6$ ) rats. Data are shown as means  $\pm$  s.d. (Dunnett).

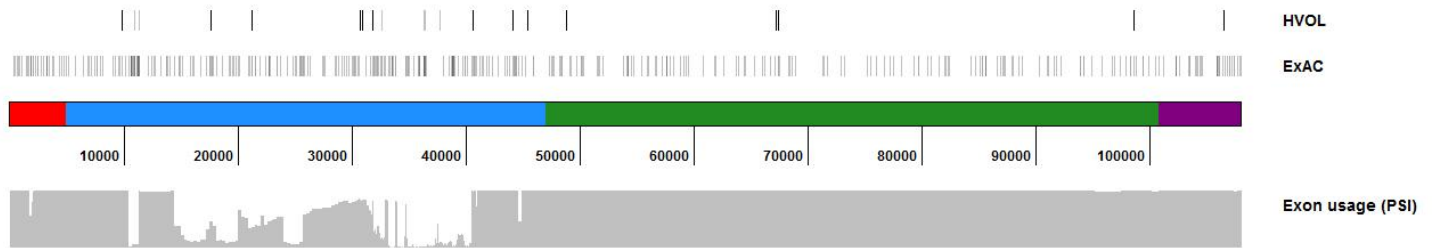

### Supplementary Figure 13

#### Distribution of TTNtv detected in the general population for MRI.

The top track shows the distribution of TTNtv in healthy volunteers (HVOL) who were phenotyped using cardiac magnetic resonance imaging. The track below depicts the distribution of TTNtv from ExAC data. Only truncations located in exons with PSI >15% are shown.

## Supplementary Tables

**Supplementary Table 1. Differential gene expression on the transcriptional and translational level as assessed by DESeq2 (FDR = 0.05). Green depicts down- and blue indicates up-regulated genes in TTNtv animals.**

| Ensembl ID          | Gene Symbol | log 2 Fold Change TTNtv / WT |        |          |        | Adj. P-value TTNtv vs WT |         |          |         |
|---------------------|-------------|------------------------------|--------|----------|--------|--------------------------|---------|----------|---------|
|                     |             | RNA-seq                      |        | Ribo-seq |        | RNA-seq                  |         | Ribo-seq |         |
|                     |             | TTNtvA                       | TTNtvZ | TTNtvA   | TTNtvZ | TTNtvA                   | TTNtvZ  | TTNtvA   | TTNtvZ  |
| ENSRNOG00000000164  | Lamp2       | 0.01                         | 0.03   | 0.18     | 0.18   | 0.028                    | n.s.    | n.s.     | n.s.    |
| ENSRNOG000000001522 | Metap1d     | -0.08                        | -0.06  | -0.03    | 0.04   | n.s.                     | 1.2E-06 | n.s.     | n.s.    |
| ENSRNOG000000003189 | Cited1      | 0.14                         | 0.33   | 0.11     | 0.19   | n.s.                     | 0.011   | n.s.     | n.s.    |
| ENSRNOG000000003284 | Epn3        | 0.29                         | 0.41   | 0.04     | 0.06   | n.s.                     | 0.002   | n.s.     | n.s.    |
| ENSRNOG000000003626 | Atp5h       | -0.01                        | 0.03   | -0.08    | 0.05   | 0.002                    | 0.001   | n.s.     | n.s.    |
| ENSRNOG000000004078 | Eno3        | -0.23                        | -0.18  | -0.39    | -0.27  | n.s.                     | n.s.    | 5.3E-06  | 0.024   |
| ENSRNOG000000005670 | Art4        | 0.43                         | 0.40   | 0.39     | 0.49   | 5.6E-04                  | 2.2E-03 | n.s.     | 0.003   |
| ENSRNOG000000006509 | Srgap3      | 0.25                         | 0.31   | -0.02    | 0.20   | n.s.                     | 0.028   | n.s.     | n.s.    |
| ENSRNOG000000007545 | Angptl4     | 0.09                         | 0.25   | 0.03     | 0.30   | n.s.                     | 0.016   | n.s.     | n.s.    |
| ENSRNOG000000007674 | Nacad       | 0.27                         | 0.36   | 0.18     | 0.35   | n.s.                     | 0.013   | n.s.     | n.s.    |
| ENSRNOG000000009691 | Lrrn2       | 0.45                         | 0.44   | 0.21     | 0.17   | 1.7E-04                  | 3.1E-04 | n.s.     | n.s.    |
| ENSRNOG000000011076 | Ank2        | -0.02                        | -0.08  | 0.23     | 0.33   | n.s.                     | n.s.    | n.s.     | 0.016   |
| ENSRNOG000000011491 | Dnajc13     | -0.04                        | -0.04  | 0.08     | 0.17   | n.s.                     | 0.008   | n.s.     | n.s.    |
| ENSRNOG000000014933 | Dnttip1     | 0.03                         | -0.03  | 0.01     | -0.01  | 3.3E-03                  | 0.000   | n.s.     | n.s.    |
| ENSRNOG000000015852 | Arhgap35    | 0.02                         | -0.04  | 0.14     | 0.08   | n.s.                     | 0.016   | n.s.     | n.s.    |
| ENSRNOG000000015912 | Ptdss2      | -0.06                        | -0.10  | 0.06     | 0.06   | n.s.                     | 0.003   | n.s.     | n.s.    |
| ENSRNOG000000016483 | Myo16       | 0.49                         | 0.64   | 0.37     | 0.45   | 3.4E-05                  | 5.8E-10 | n.s.     | n.s.    |
| ENSRNOG000000016892 | Nr2f6       | -0.05                        | -0.23  | -0.10    | -0.03  | n.s.                     | 0.028   | n.s.     | n.s.    |
| ENSRNOG000000017460 | Imp3        | 0.00                         | -0.12  | 0.01     | 0.01   | n.s.                     | 0.003   | n.s.     | n.s.    |
| ENSRNOG000000017503 | Ppargc1b    | -0.14                        | -0.24  | -0.17    | -0.22  | 0.001                    | 0.001   | n.s.     | n.s.    |
| ENSRNOG000000017786 | Acta1       | -0.42                        | -0.39  | -0.53    | -0.41  | n.s.                     | n.s.    | 0.003    | n.s.    |
| ENSRNOG000000018610 | Pde6d       | 0.05                         | -0.04  | 0.05     | 0.02   | 1.8E-08                  | 0.003   | n.s.     | n.s.    |
| ENSRNOG000000019028 | Znrf2       | -0.06                        | -0.13  | -0.04    | 0.00   | n.s.                     | 0.003   | n.s.     | n.s.    |
| ENSRNOG000000019094 | Gstm2       | 0.06                         | 0.04   | 0.03     | -0.03  | n.s.                     | 0.016   | n.s.     | n.s.    |
| ENSRNOG000000020263 | Atp1a3      | 0.52                         | 0.34   | 0.99     | 0.71   | n.s.                     | n.s.    | n.s.     | 1.8E-06 |
| ENSRNOG000000020373 | Dap3        | -0.04                        | -0.01  | -0.14    | -0.12  | n.s.                     | 0.008   | n.s.     | n.s.    |
| ENSRNOG000000020417 | Gsk3a       | -0.03                        | -0.07  | -0.09    | 0.00   | 0.001                    | 0.003   | n.s.     | n.s.    |
| ENSRNOG000000020641 | RGD1560789  | -0.16                        | -0.32  | -0.21    | -0.08  | n.s.                     | 0.034   | n.s.     | n.s.    |
| ENSRNOG000000020650 | Slc17a7     | 0.49                         | 0.53   | 0.31     | 0.34   | 3.4E-05                  | 2.5E-06 | n.s.     | n.s.    |
| ENSRNOG000000020915 | Setd2       | -0.05                        | -0.12  | -0.11    | -0.10  | n.s.                     | 0.001   | n.s.     | n.s.    |
| ENSRNOG000000021095 | Fxyd3       | 0.40                         | 0.33   | 0.25     | 0.26   | 6.5E-04                  | 1.6E-02 | n.s.     | n.s.    |
| ENSRNOG000000021242 | Adam33      | 0.27                         | 0.48   | 0.09     | 0.18   | n.s.                     | 0.000   | n.s.     | n.s.    |
| ENSRNOG000000022178 | Dcdc5       | -0.25                        | -0.35  | -0.19    | -0.28  | n.s.                     | 0.015   | n.s.     | n.s.    |
| ENSRNOG000000025518 | Lrrc16b     | 0.19                         | 0.30   | -0.05    | 0.16   | n.s.                     | 0.001   | n.s.     | n.s.    |
| ENSRNOG000000027959 | Ppp1r12c    | -0.13                        | -0.13  | -0.25    | -0.45  | n.s.                     | n.s.    | n.s.     | 0.001   |
| ENSRNOG000000028498 | Wdr1        | -0.05                        | -0.02  | -0.05    | -0.04  | n.s.                     | 0.016   | n.s.     | n.s.    |
| ENSRNOG000000029662 | Wdfy4       | 0.51                         | 0.45   | 0.32     | 0.39   | 1.5E-07                  | 1.4E-05 | n.s.     | n.s.    |
| ENSRNOG000000030285 | Epha3       | -0.01                        | 0.16   | 0.23     | 0.42   | n.s.                     | n.s.    | n.s.     | 0.016   |
| ENSRNOG000000031890 | Ncam1       | 0.36                         | 0.37   | 0.38     | 0.43   | n.s.                     | n.s.    | 0.014    | 0.001   |
| ENSRNOG000000033893 | Cacna1h     | 0.34                         | 0.36   | 0.24     | 0.30   | 0.034                    | 0.008   | n.s.     | n.s.    |
| ENSRNOG000000039582 | RGD1561161  | 0.19                         | 0.15   | 0.28     | 0.37   | n.s.                     | n.s.    | n.s.     | 0.039   |
| ENSRNOG000000040201 | Atp6ap1l    | 0.28                         | 0.38   | 0.22     | 0.34   | n.s.                     | 0.001   | n.s.     | n.s.    |
| ENSRNOG000000042245 | Dcaf7       | -0.06                        | -0.12  | 0.03     | -0.03  | 0.034                    | n.s.    | n.s.     | n.s.    |
| ENSRNOG000000045992 | Tlr8        | -0.02                        | -0.06  | 0.40     | 0.42   | n.s.                     | n.s.    | n.s.     | 0.029   |
| ENSRNOG000000046468 | Ptgr        | 0.31                         | 0.49   | 0.41     | 0.57   | n.s.                     | n.s.    | n.s.     | 0.001   |
| ENSRNOG000000046772 | Fam83c      | 0.26                         | 0.35   | 0.11     | 0.08   | n.s.                     | 0.016   | n.s.     | n.s.    |
| ENSRNOG000000050145 | Ahnak       | 0.08                         | 0.01   | 0.32     | 0.35   | n.s.                     | n.s.    | n.s.     | 0.030   |
| ENSRNOG000000050841 | Ache        | 0.11                         | 0.36   | 0.13     | 0.28   | n.s.                     | 0.003   | n.s.     | n.s.    |

**Supplementary Table 2. Metabolite measurements of acylcarnitines from WT and TTNtv rat hearts.**

| Acylcarnitine     | Concentration (pmol/mg tissue) |       |              |        |              |       |        |        | TTNtv/WT Ratio | TTNtv/WT P value |
|-------------------|--------------------------------|-------|--------------|--------|--------------|-------|--------|--------|----------------|------------------|
|                   | WT (n=5)                       |       | TTNtvA (n=5) |        | TTNtvZ (n=5) |       | TTNtv  |        |                |                  |
|                   | Mean                           | SD    | Mean         | SD     | Mean         | SD    | Mean   | SD     |                |                  |
| C2                | 394.91                         | 43.55 | 528.12       | 104.03 | 297.18       | 86.89 | 412.65 | 137.78 | 1.04           | 0.717            |
| C3                | 4.36                           | 0.99  | 5.76         | 1.68   | 4.84         | 1.84  | 5.30   | 1.80   | 1.22           | 0.213            |
| C4                | 8.99                           | 1.78  | 11.11        | 1.26   | 7.79         | 1.65  | 9.45   | 2.23   | 1.05           | 0.693            |
| C5:1              | 0.56                           | 0.11  | 0.50         | 0.08   | 0.61         | 0.18  | 0.55   | 0.14   | 0.99           | 0.966            |
| C5                | 1.26                           | 0.43  | 1.24         | 0.42   | 1.78         | 0.90  | 1.51   | 0.69   | 1.20           | 0.404            |
| C4-OH             | 8.02                           | 2.43  | 9.98         | 2.85   | 8.20         | 5.40  | 9.09   | 4.21   | 1.13           | 0.544            |
| C6                | 3.16                           | 0.92  | 2.45         | 0.80   | 1.40         | 0.58  | 1.93   | 0.71   | 0.61           | 0.036            |
| C5-OH/C3-DC       | 3.67                           | 0.51  | 4.23         | 0.66   | 3.08         | 0.53  | 3.66   | 0.82   | 1.00           | 0.971            |
| C4-DCC6-OH        | 10.77                          | 1.78  | 13.32        | 2.02   | 9.63         | 2.12  | 11.47  | 2.63   | 1.07           | 0.553            |
| C8                | 1.14                           | 0.43  | 0.87         | 0.36   | 0.53         | 0.23  | 0.70   | 0.25   | 0.61           | 0.081            |
| C5-DC             | 0.49                           | 0.05  | 0.50         | 0.05   | 0.41         | 0.05  | 0.45   | 0.07   | 0.92           | 0.226            |
| C8-OH/C6-DC       | 0.38                           | 0.08  | 0.41         | 0.14   | 0.20         | 0.10  | 0.30   | 0.16   | 0.80           | 0.235            |
| C12:1             | 0.54                           | 0.20  | 0.49         | 0.17   | 0.33         | 0.09  | 0.41   | 0.11   | 0.76           | 0.235            |
| C12               | 1.91                           | 0.71  | 1.54         | 0.61   | 0.95         | 0.49  | 1.25   | 0.46   | 0.66           | 0.110            |
| C12:1-OH          | 0.09                           | 0.02  | 0.08         | 0.03   | 0.05         | 0.02  | 0.06   | 0.02   | 0.68           | <b>0.041</b>     |
| C12-OH/C10-DC     | 0.12                           | 0.03  | 0.12         | 0.03   | 0.07         | 0.04  | 0.10   | 0.04   | 0.78           | 0.139            |
| C14:2             | 0.70                           | 0.32  | 0.55         | 0.30   | 0.47         | 0.22  | 0.51   | 0.19   | 0.73           | 0.270            |
| C14:1             | 2.93                           | 0.97  | 2.68         | 0.79   | 1.95         | 0.80  | 2.31   | 0.68   | 0.79           | 0.251            |
| C14               | 7.54                           | 2.77  | 5.97         | 2.56   | 4.61         | 1.68  | 5.29   | 1.36   | 0.70           | 0.147            |
| C14:2-OH          | 0.41                           | 0.16  | 0.30         | 0.18   | 0.33         | 0.21  | 0.31   | 0.15   | 0.75           | 0.271            |
| C14:1-OH          | 1.48                           | 0.47  | 1.20         | 0.54   | 0.81         | 0.31  | 1.00   | 0.34   | 0.68           | 0.090            |
| C14-OH/C12-DC     | 0.80                           | 0.13  | 0.74         | 0.13   | 0.63         | 0.28  | 0.69   | 0.20   | 0.86           | 0.219            |
| C16:2             | 1.42                           | 0.61  | 1.24         | 0.50   | 1.11         | 0.39  | 1.17   | 0.29   | 0.83           | 0.431            |
| C16:1             | 7.94                           | 2.46  | 6.81         | 1.84   | 4.85         | 2.55  | 5.83   | 2.02   | 0.73           | 0.142            |
| C16               | 39.33                          | 12.07 | 29.09        | 11.32  | 21.63        | 9.28  | 25.36  | 7.62   | 0.64           | 0.059            |
| C16:2-OH          | 0.50                           | 0.13  | 0.38         | 0.15   | 0.32         | 0.12  | 0.35   | 0.10   | 0.70           | 0.069            |
| C16:1-OH/C14:1-DC | 1.71                           | 0.46  | 1.48         | 0.46   | 1.28         | 0.59  | 1.38   | 0.42   | 0.81           | 0.213            |
| C16-OH            | 2.11                           | 0.35  | 2.11         | 0.22   | 1.94         | 0.93  | 2.03   | 0.65   | 0.96           | 0.760            |
| C18:3             | 2.29                           | 1.04  | 1.35         | 1.05   | 1.05         | 0.24  | 1.20   | 0.31   | 0.52           | 0.077            |
| C18:2             | 17.85                          | 8.08  | 11.51        | 7.94   | 9.49         | 2.42  | 10.50  | 2.42   | 0.59           | 0.111            |
| C18:1             | 39.98                          | 13.59 | 29.46        | 12.27  | 20.50        | 10.26 | 24.98  | 8.64   | 0.62           | 0.068            |
| C18               | 12.03                          | 3.78  | 6.56         | 4.63   | 6.02         | 1.85  | 6.29   | 1.55   | 0.52           | <b>0.025</b>     |
| C18:2-OH/C16:2-DC | 0.94                           | 0.32  | 0.85         | 0.25   | 1.02         | 0.57  | 0.93   | 0.39   | 1.00           | 0.993            |
| C18:1-OH/C16:1-DC | 2.62                           | 0.59  | 2.58         | 0.37   | 2.27         | 1.20  | 2.43   | 0.84   | 0.93           | 0.618            |
| C18-OH/C16-DC     | 0.71                           | 0.20  | 0.60         | 0.19   | 0.58         | 0.25  | 0.59   | 0.17   | 0.83           | 0.265            |
| C20:4             | 1.72                           | 0.64  | 0.92         | 0.82   | 0.85         | 0.36  | 0.89   | 0.35   | 0.51           | <b>0.040</b>     |
| C20:3             | 0.51                           | 0.17  | 0.32         | 0.20   | 0.31         | 0.13  | 0.32   | 0.10   | 0.62           | 0.067            |
| C20:2             | 0.71                           | 0.19  | 0.65         | 0.13   | 0.70         | 0.48  | 0.68   | 0.33   | 0.95           | 0.794            |
| C20:1             | 1.37                           | 0.37  | 1.20         | 0.29   | 1.19         | 0.71  | 1.20   | 0.49   | 0.88           | 0.468            |
| C20               | 0.31                           | 0.09  | 0.24         | 0.08   | 0.20         | 0.11  | 0.22   | 0.08   | 0.71           | 0.098            |
| C20:1-OH/C18:1-DC | 0.32                           | 0.08  | 0.34         | 0.03   | 0.29         | 0.16  | 0.32   | 0.11   | 1.00           | 0.985            |
| C20-OH/C18-DC     | 0.15                           | 0.06  | 0.11         | 0.06   | 0.08         | 0.02  | 0.09   | 0.03   | 0.60           | 0.094            |
| C22:4             | 0.12                           | 0.04  | 0.07         | 0.06   | 0.07         | 0.05  | 0.07   | 0.05   | 0.59           | 0.076            |
| C22:1             | 0.13                           | 0.04  | 0.14         | 0.03   | 0.12         | 0.05  | 0.13   | 0.04   | 1.04           | 0.798            |
| C22               | 0.11                           | 0.03  | 0.15         | 0.02   | 0.07         | 0.01  | 0.11   | 0.05   | 1.04           | 0.825            |

**Supplementary Table 3. Metabolite measurements of glycolysis intermediates from WT and TTNtv hearts.**  
Concentration (nmol/g tissue)

| Metabolite                 | WT (n=6) |      | TTNtvA (n=6) |      | TTNtvZ (n=6) |      | TTNtv |      | TTNtv/WT |         |
|----------------------------|----------|------|--------------|------|--------------|------|-------|------|----------|---------|
|                            | Mean     | SD   | Mean         | SD   | Mean         | SD   | Mean  | SD   | Ratio    | P value |
| Dihydroxyacetone phosphate | 176      | 64   | 183          | 49   | 172          | 46   | 177   | 46   | 1        | 0.96    |
| Fructose 1,6-diphosphate   | 271      | 129  | 297          | 138  | 299          | 127  | 298   | 126  | 1.1      | 0.68    |
| Fructose 6-phosphate       | 349      | 156  | 380          | 152  | 409          | 167  | 394   | 153  | 1.1      | 0.57    |
| Glucose 1-phosphate        | 117      | 50   | 125          | 49   | 132          | 54   | 129   | 49   | 1.1      | 0.63    |
| Glucose 6-phosphate        | 1460     | 715  | 1605         | 709  | 1773         | 805  | 1689  | 728  | 1.2      | 0.54    |
| Lactic acid                | 13744    | 2540 | 15430        | 2501 | 14835        | 3163 | 15132 | 2736 | 1.1      | 0.31    |
| Phosphoenolpyruvic acid    | 10       | 2    | 10           | 2    | 11           | 1    | 11    | 2    | 1.1      | 0.43    |



**Supplementary Table 4. TTNtvs in expressed exons (PSI>15%) in healthy individuals who underwent cardiac MRI in the Digital Heart Project.**

| Sample identification | Hg19 genomic start position | LRG genomic start position | Transcript effect | Protein effect | Exon number | Median exon PSI | Present in NZBA | Present in NZB | Band   | Variant type            | ExAC frequency |
|-----------------------|-----------------------------|----------------------------|-------------------|----------------|-------------|-----------------|-----------------|----------------|--------|-------------------------|----------------|
| 14AB03203             | 179629515                   | 71015                      | c.9727C>T         | p.Q3243X       | 42          | 100             | Y               | Y              | I-band | Nonsense                | 0              |
| 14ZN01340             | 179595884                   | 104646                     | c.17508dupA       | NA             | 61          | 35              | Y               |                | I-band | Frameshift              | 0              |
| 14JD01896             | 179588844                   | 111686                     | c.21142C>T        | p.R7048X       | 74          | 25              | Y               |                | I-band | Nonsense                | 0.00002        |
| 14AL03036             | 179563642                   | 136888                     | c.30683-1G>T      | NA             | 113         | 80              | Y               |                | I-band | Splice acceptor variant | 0              |
| 14EC01433             | 179560998                   | 139532                     | c.30803-2A>G      | NA             | 115         | 74              | Y               |                | I-band | Splice acceptor variant | 0              |
| 14MS02961             | 179554624                   | 145906                     | c.31763-1G>A      | NA             | 123         | 78              | Y               |                | I-band | Splice acceptor variant | 0.00027        |
| 14RH03039             | 179554624                   | 145906                     | c.31763-1G>A      | NA             | 123         | 78              | Y               |                | I-band | Splice acceptor variant | 0.00027        |
| 14CB02200             | 179506963                   | 193567                     | c.40558+1G>A      | NA             | 220         | 100             | Y               | Y              | I-band | Splice donor variant    | 0.00012        |
| 14HB02599             | 179495671                   | 204859                     | c.44015-1G>T      | NA             | 239         | 100             | Y               | Y              | I-band | Splice acceptor variant | 0              |
| 14MC001427            | 179486054                   | 214476                     | c.45391delA       | NA             | 247         | 100             | Y               | Y              | I-band | Frameshift              | 0              |
| 14RS02105             | 179479631                   | 220899                     | c.48703C>T        | p.Q16235X      | 261         | 100             | Y               | Y              | A-band | Nonsense                | 0              |
| 14JM01448             | 179444855                   | 255675                     | c.67159delA       | p.I22387X      | 319         | 100             | Y               | Y              | A-band | Frameshift              | 0              |
| 14SM01546             | 179444666                   | 255864                     | c.67348C>T        | p.Q22450X      | 319         | 100             | Y               | Y              | A-band | Nonsense                | 0              |
| 14JC01930             | 179404286                   | 296244                     | c.98506C>T        | p.R32836X      | 353         | 100             | Y               | Y              | A-band | Nonsense                | 0              |
| 14TW02859             | 179394786                   | 305744                     | c.106432G>T       | p.E35478X      | 360         | 100             | Y               | Y              | M-band | Nonsense                | 0              |

**Supplementary Table 5: For each cardiac phenotype two linear regression models were built to adjust for the known contribution of clinical variables. The first model was optimized to minimize the Bayesian Information Criterion. To the optimized first model, the *ttt* genotype was then added to create a second model and details of this presented here. The two models were then compared using ANOVA. BSA = body surface area; LVEDV = left ventricular end diastolic volume; LVESV = left ventricular end systolic volume; LVEF = left ventricular ejection fraction; LVM = left ventricular mass; SBP = systolic blood pressure; TTNtv = titin truncating variants.**

| Phenotype         | Model Terms              | Unstandardized Coefficient | Standardized Coefficient | Standard Error | Component P value       | Full model              |                          | P value for comparison between models |
|-------------------|--------------------------|----------------------------|--------------------------|----------------|-------------------------|-------------------------|--------------------------|---------------------------------------|
|                   |                          |                            |                          |                |                         | Adjusted R <sup>2</sup> | P value                  |                                       |
| <b>LVEDV (ml)</b> | (Intercept)              | -3.99                      | 0                        | 7.46           | 0.59                    | 0.58                    | 4.57 x10 <sup>-261</sup> | 0.03                                  |
|                   | Age (years)              | -0.54                      | -0.23                    | 0.04           | 1.13 x10 <sup>-31</sup> |                         |                          |                                       |
|                   | Gender (male)            | 13.8                       | 0.21                     | 1.44           | 3.52 x10 <sup>-21</sup> |                         |                          |                                       |
|                   | SBP (mmHg)               | 0.15                       | 0.07                     | 0.04           | 0.001                   |                         |                          |                                       |
|                   | Race                     | -4.64                      | -0.12                    | 0.65           | 2.05 x10 <sup>-12</sup> |                         |                          |                                       |
|                   | BSA (kg/m <sup>2</sup> ) | 75.3                       | 0.48                     | 3.53           | 9.08 x10 <sup>-88</sup> |                         |                          |                                       |
|                   | Activity Score           | 8.06                       | 0.22                     | 0.66           | 3.23 x10 <sup>-32</sup> |                         |                          |                                       |
|                   | Heart Rate (bpm)         | -0.13                      | -0.07                    | 0.03           | 1.47 x10 <sup>-05</sup> |                         |                          |                                       |
| TTNtv             | 11.9                     | 0.04                       | 5.39                     | 0.03           |                         |                         |                          |                                       |
| <b>LVESV (ml)</b> | (Intercept)              | 4.58                       | 0                        | 4              | 0.25                    | 0.43                    | 5.4 x10 <sup>-170</sup>  | 0.015                                 |
|                   | Age (years)              | -0.29                      | -0.24                    | 0.02           | 2.25 x10 <sup>-30</sup> |                         |                          |                                       |
|                   | Gender (male)            | 9.06                       | 0.28                     | 0.83           | 1.33 x10 <sup>-26</sup> |                         |                          |                                       |
|                   | Race                     | -1.8                       | -0.09                    | 0.38           | 3.21 x10 <sup>-06</sup> |                         |                          |                                       |
|                   | BSA (kg/m <sup>2</sup> ) | 26.2                       | 0.33                     | 2.03           | 7.29 x10 <sup>-36</sup> |                         |                          |                                       |
|                   | Activity Score           | 3.73                       | 0.19                     | 0.39           | 4.25 x10 <sup>-21</sup> |                         |                          |                                       |
|                   | Heart Rate (bpm)         | -0.04                      | -0.05                    | 0.02           | 0.008                   |                         |                          |                                       |
|                   | TTNtv                    | 7.69                       | 0.05                     | 3.17           | 0.015                   |                         |                          |                                       |
| <b>LVEF (%)</b>   | (Intercept)              | 60.5                       | 0                        | 1.18           | <1x10 <sup>-100</sup>   | 0.14                    | 3.05 x10 <sup>-43</sup>  | 0.03                                  |
|                   | Age (years)              | 0.07                       | 0.18                     | 0.01           | 4.79 x10 <sup>-11</sup> |                         |                          |                                       |
|                   | Gender (male)            | -2.95                      | 0.27                     | 0.28           | 7.93 x10 <sup>-24</sup> |                         |                          |                                       |
|                   | SBP (mmHg)               | 0.04                       | 0.12                     | 0.01           | 2.12 x10 <sup>-05</sup> |                         |                          |                                       |
|                   | Activity Score           | -0.65                      | -0.11                    | 0.16           | 3.32 x10 <sup>-05</sup> |                         |                          |                                       |
|                   | TTNtv                    | -2.81                      | -0.05                    | 1.29           | 0.03                    |                         |                          |                                       |
